# Supplementary material for: G6P[8] Rotavirus a Possessing a Wa-like VP3 Gene from a Child with Acute Gastroenteritis Living in the Northwest Amazon Region
Source: MDPI journal article supplement (doi:10.3390/pathogens12070956), 2023-07-20
Supplement: s1 [file s1]

## Supplementary Materials

**Table S1.** Genotype constellation of human Brazilian rotavirus strains G6P[8] and G3P[8], G3P[8] (Spain and Japan) and bovine G12P[8]. The G6P[8] strain detected in this study (sample ID-LVCA: 28398) is shown in bold.

| Genogroup | Rotavirus A strain                           | Ref.              | Origin       | Genotypes |             |           |           |           |           |           |           |           |           |           |  |
|-----------|----------------------------------------------|-------------------|--------------|-----------|-------------|-----------|-----------|-----------|-----------|-----------|-----------|-----------|-----------|-----------|--|
|           |                                              |                   |              | VP7       | VP4         | VP6       | VP1       | VP2       | VP3       | NSP1      | NSP2      | NSP3      | NSP4      | NSP5/6    |  |
| DS-like   | RVA/Human-wt/BRA/LVCA_30388/2019/G6P[8]      | 11                | Human        | G6        | P[8]        | I2        | R2        | C2        | M2        | A2        | N2        | T2        | E2        | H2        |  |
|           | RVA/Human-wt/BRA/LVCA_30390/2019/G6P[8]      | 11                | Human        | G6        | P[8]        | I2        | R2        | C2        | M2        | A2        | N2        | T2        | E2        | H2        |  |
|           | RVA/Human-wt/BRA/LVCA_30391/2019/G6P[8]      | 11                | Human        | G6        | P[8]        | I2        | R2        | C2        | M2        | A2        | N2        | T2        | E2        | H2        |  |
|           | RVA/Human-wt/BRA/AM-16-34/2016/G3P[8]        | 22                | Human        | G3        | P[8]        | I2        | R2        | C2        | M2        | A2        | N1        | T2        | E2        | H2        |  |
|           | <b>RVA/Human-wt/BRA/RR_28398/2017/G6P[8]</b> | <b>This study</b> | <b>Human</b> | <b>G6</b> | <b>P[8]</b> | <b>I2</b> | <b>R2</b> | <b>C2</b> | <b>M1</b> | <b>A2</b> | <b>N2</b> | <b>T2</b> | <b>E2</b> | <b>H2</b> |  |
|           | RVA/Human-wt/ESP/SS61720845/2015/G3P[8]      | 21                | Human        | G3        | P[8]        | I2        | R2        | C2        | M2        | A2        | N2        | T2        | E2        | H2        |  |
|           | RVA/Human-wt/DEU/GER29-14/2014/G6P[9]        | 27                | Human        | G6        | P[9]        | I2        | R2        | C2        | M2        | A3        | N2        | T3        | E2        | H3        |  |
| Wa-like   | RVA/Cow-wt/UGA/BUW-14-A035/2014/G12P[8]      | 19                | Bovine       | G12       | P[8]        | I1        | R1        | C1        | M1        | A1        | N1        | T1        | E1        | H1        |  |
| AU-1-like | RVA/Human-tc/JPN/AU-1/1982/G3P3[9]           | 30                | Human        | G3        | P[9]        | I3        | R3        | C3        | M3        | A3        | N3        | T3        | E3        | H3        |  |

**Table S2.** Primers used for PCR amplification of the different genes of the G6P[8] strain detected in this.

| Gene/Name <sup>1</sup>  | Primer Nucleotide Sequence (5'-3') | Reference <sup>2</sup> |
|-------------------------|------------------------------------|------------------------|
| <b>VP7</b> -Vp7G6a (F)  | AGA CGG TGT AAA TCA TAA GT         | [18]                   |
| <b>VP7</b> -VP7 R       | AAC TTGCC ACC ATTT TTT TCC         | [10]                   |
| <b>VP4</b> -VP4 F       | TAT GCT CCA GTN AAT TGG            | [10]                   |
| <b>VP4</b> -VP4R        | ATT GCAT TTT CTT TCC ATA ATG       | [10]                   |
| <b>VP6</b> - GEN-VP6F   | GGCTTTWAAACGAAGTCTTC               | [6]                    |
| <b>VP6</b> - GEN-VP6R   | GGTCACATCCTCTCACT                  | [6]                    |
| <b>VP1</b> -VP1-Uf      | TCAGGAATAGCTGATGAAATTGC            | [29]                   |
| <b>VP1</b> -VP1-Ur      | AATAATTGATAACATCCATAATTA           | [29]                   |
| <b>VP2</b> -VP2-Uf      | GCTATTAAAGGCTCAATGGCGTAC           | [29]                   |
| <b>VP2</b> -VP2-Ur      | GGATGTAGAATTGATGGATAATTG           | [29]                   |
| <b>VP3</b> - G6VP3FeIF  | CTAATCTCACTACGCATAATATAC           | This study             |
| <b>VP3</b> - G6VP3FeIR  | CTATCCAATGGATCCCACGTCTCA           | This study             |
| <b>NSP1</b> -GEN_ NSP1F | GGCTTTTTTTTATGAAAAGTCTTG           | [6]                    |
| <b>NSP1</b> -GEN_ NSP1R | GGTCACATTTTATGCTGCC                | [6]                    |
| <b>NSP2</b> -GEN_ NSP2F | GGCTTTTAAAGCGTCTCAG                | [6]                    |
| <b>NSP2</b> -GEN_ NSP2R | GGTCACATAAGCGCTTTC                 | [6]                    |
| <b>NSP3</b> -MAX-NSP3F  | GGCTTTTAATGCTTTTCAGTG              | [29]                   |
| <b>NSP3</b> -MAX-NSP3R  | GGTCACATAACGCCCTATAG               | [29]                   |
| <b>NSP4</b> -GEN_ NSP4F | GGCTTTTAAAAGTTCTGTTC               | [6]                    |
| <b>NSP4</b> -GEN_ NSP4R | GGWYACRYTAAGACCRTTCC               | [6]                    |
| NSP5/6 -MAX-11F         | GGC TTT AAA GCG CTA CAG TGA        | [6]                    |
| NSP5/6 -MAX-11R         | GGT CAC AAA ACG GGA GTG GGG        | [6]                    |

<sup>1</sup> F = Forward primer; R = Reverse primer; <sup>2</sup> = consider the cited references of the paper.
